# Supplementary material for: Temporal Shifts in Cardiovascular Risk Factor Distribution
Source: PubMed Central journal article supplement (PMC3898870; doi:10.1016/j.amepre.2013.10.011), 2014-02
Supplement: mmc1.pdf [file mmc1.pdf]

# Temporal Shifts in Cardiovascular Risk Factor Distribution

Gráinne H Long, PhD, Rebecca K Simmons, PhD, Margareta Norberg, MD, Patrik Wennberg, MD, Bernt Lindahl, MD, Olov Rolandsson, MD, Simon J Griffin, MD, Lars Weinehall, MD

## Appendix A

Age-adjusted differences in continuous cardiovascular risk factors between 1991–1995 and (A) 1996–2000; (B) 2001–2005; and (C) 2006–2010, stratified by SES

| Variable (units)         | SES    | Risk factor $\beta$ -coefficients (95% CI) <sup>a</sup> |                      |                      |
|--------------------------|--------|---------------------------------------------------------|----------------------|----------------------|
|                          |        | (A)                                                     | (B)                  | (C)                  |
| <b>Men</b>               |        |                                                         |                      |                      |
| 2-hour PG (mmol/l)       | Basic  | 0.04 (-0.05, 0.12)                                      | 0.26 (0.18, 0.35)    | 0.11 (0.01, 0.21)    |
|                          | Middle | 0.08 (0.02, 0.14)                                       | 0.28 (0.23, 0.34)    | 0.21 (0.15, 0.27)    |
|                          | High   | 0.08 (-0.01, 0.18)                                      | 0.25 (0.16, 0.33)    | 0.21 (0.12, 0.29)    |
| BMI (kg/m <sup>2</sup> ) | Basic  | 0.29 (0.13, 0.45)                                       | 0.85 (0.70, 1.01)    | 1.19 (0.99, 1.40)    |
|                          | Middle | 0.48 (0.36, 0.61)                                       | 0.93 (0.83, 1.04)    | 1.37 (1.24, 1.49)    |
|                          | High   | 0.48 (0.30, 0.66)                                       | 0.78 (0.63, 0.93)    | 1.12 (0.94, 1.29)    |
| Cholesterol (mmol/l)     | Basic  | -0.22 (-0.27, -0.17)                                    | -0.70 (-0.75, -0.65) | -0.62 (-0.68, -0.57) |
|                          | Middle | -0.17 (-0.21, -0.13)                                    | -0.58 (-0.62, -0.55) | -0.48 (-0.52, -0.44) |
|                          | High   | -0.05 (-0.11, 0.01)                                     | -0.44 (-0.50, -0.39) | -0.41 (-0.46, -0.35) |
| Systolic BP (mm Hg)      | Basic  | -0.60 (-1.32, 0.13)                                     | -2.01 (-2.74, -1.27) | -3.54 (-4.38, -2.70) |
|                          | Middle | -0.77 (-1.31, -0.22)                                    | -2.24 (-2.72, -1.77) | -2.54 (-3.05, -2.02) |
|                          | High   | 0.71 (-0.12, 1.55)                                      | -2.00 (-2.71, -1.30) | -1.52 (-2.28, -0.77) |
| <b>Women</b>             |        |                                                         |                      |                      |
| 2-hour PG (mmol/l)       | Basic  | 0.15 (0.07, 0.23)                                       | 0.25 (0.17, 0.33)    | 0.19 (0.09, 0.29)    |
|                          | Middle | 0.02 (-0.03, 0.07)                                      | 0.18 (0.13, 0.23)    | 0.12 (0.07, 0.18)    |
|                          | High   | 0.09 (0.03, 0.16)                                       | 0.20 (0.15, 0.26)    | 0.12 (0.06, 0.18)    |
| BMI (kg/m <sup>2</sup> ) | Basic  | 0.34 (0.15, 0.52)                                       | 0.49 (0.31, 0.68)    | 0.88 (0.62, 1.13)    |
|                          | Middle | 0.49 (0.34, 0.64)                                       | 0.89 (0.77, 1.02)    | 1.19 (1.03, 1.34)    |
|                          | High   | 0.35 (0.17, 0.53)                                       | 0.64 (0.50, 0.78)    | 0.74 (0.57, 0.91)    |
| Cholesterol (mmol/l)     | Basic  | -0.23 (-0.28, -0.18)                                    | -0.67 (-0.73, -0.63) | -0.68 (-0.73, -0.62) |
|                          | Middle | -0.13 (-0.17, -0.09)                                    | -0.49 (-0.53, -0.46) | -0.41 (-0.44, -0.37) |
|                          | High   | -0.03 (-0.08, 0.01)                                     | -0.40 (-0.44, -0.36) | -0.30 (-0.34, -0.25) |
| Systolic BP (mm Hg)      | Basic  | -0.23 (-0.99, 0.52)                                     | -3.44 (-4.19, -2.69) | -6.78 (-7.64, -5.90) |
|                          | Middle | 0.35 (-0.23, 0.93)                                      | -2.07 (-2.58, -1.56) | -3.85 (-4.41, -3.29) |
|                          | High   | 0.80 (0.10, 1.50)                                       | -2.02 (-2.61, -1.43) | -2.95 (-3.60, -2.31) |

$\beta$ -coefficients (95% CI) are presented separately by gender. <sup>a</sup>All regression models adjusted for age and clustering by VIP participant.

VIP, Västerbotten Intervention Programme
